# Supplementary material for: Evaluation of Arabica Coffee Fermentation Using Machine Learning
Source: MDPI journal article supplement (doi:10.3390/foods13030454), 2024-02-01
Supplement: s1 [file s1]

**Table S2.** Texture analysis averages (strength) for the treatments analyzed.

| <b>Treatment</b> | <b>Mean</b>        | <b>Standard deviation</b> |
|------------------|--------------------|---------------------------|
| Control - NC     | 53392 <sup>a</sup> | 4738                      |
| Control - PC     | 50060 <sup>a</sup> | 5115                      |
| 24h NC SSF SPF   | 56683 <sup>a</sup> | 2917                      |
| 24h NC SSF SCF   | 48102 <sup>a</sup> | 5571                      |
| 24h NC SMF SPF   | 48618 <sup>a</sup> | 2674                      |
| 24h NC SMF SCF   | 52887 <sup>a</sup> | 3665                      |
| 24h PC SSF SPF   | 49598 <sup>a</sup> | 4660                      |
| 24h PC SSF SCF   | 49019 <sup>a</sup> | 5196                      |
| 24h PC SMF SPF   | 47907 <sup>a</sup> | 4695                      |
| 24h PC SMF SCF   | 52384 <sup>a</sup> | 3859                      |
| 48h NC SSF SPF   | 50521 <sup>a</sup> | 4735                      |
| 48h NC SSF SCF   | 49004 <sup>a</sup> | 3122                      |
| 48h NC SMF SPF   | 50110 <sup>a</sup> | 4454                      |
| 48h NC SMF SCF   | 50836 <sup>a</sup> | 3025                      |
| 48h PC SSF SPF   | 53819 <sup>a</sup> | 3859                      |
| 48h PC SSF SCF   | 51554 <sup>a</sup> | 5763                      |
| 48h PC SMF SPF   | 49524 <sup>a</sup> | 1704                      |
| 48h PC SMF SCF   | 50454 <sup>a</sup> | 4348                      |
| 72h NC SSF SPF   | 52660 <sup>a</sup> | 2622                      |
| 72h NC SSF SCF   | 46902 <sup>a</sup> | 2531                      |
| 72h NC SMF SPF   | 51054 <sup>a</sup> | 5030                      |
| 72h NC SMF SCF   | 51870 <sup>a</sup> | 3738                      |
| 72h PC SSF SPF   | 51380 <sup>a</sup> | 4272                      |
| 72h PC SSF SCF   | 47522 <sup>a</sup> | 4331                      |
| 72h PC SMF SPF   | 51806 <sup>a</sup> | 4036                      |
| 72h PC SMF SCF   | 47557 <sup>a</sup> | 2919                      |

NC= Natural coffee; PC= Pulped coffee

SSF= Solid-state Fermentation; SMF = Submerged Fermentation

SPF = Spontaneous fermentation; SCF= Starter culture fermentation

Data are shown as the mean.  $\pm$  = standard deviation. Different lowercase letters indicate a statistically significant difference ( $p < 0.05$ ) by the Tukey test evaluating the interaction of strength data with fermented coffee treatments.
