# Supplementary material for: Evaluation of Arabica Coffee Fermentation Using Machine Learning
Source: MDPI journal article supplement (doi:10.3390/foods13030454), 2024-02-01
Supplement: s1 [file s1]

**Table S3.** General sensory score and descriptive attributes of coffees during the coffee fermentation process.

| Treatment      | Overall score    | Descriptive sensory attributes                                         |
|----------------|------------------|------------------------------------------------------------------------|
| Control - NC   | 82.40 $\pm$ 0.75 | Caramelized, nutty, chocolate.                                         |
| Control - PC   | 82.50 $\pm$ 0.62 | Caramelized, nutty, chocolate.                                         |
| 24h NC SSF SPF | 82.40 $\pm$ 0.57 | Caramelized, nutty, chocolate, citrus fruit, brown sugar, citric acid. |
| 24h NC SSF SCF | 82.95 $\pm$ 0.12 | Caramelized, nutty, leve frutado, brown sugar.                         |
| 24h NC SMF SPF | 83.45 $\pm$ 0.57 | Caramelized, nutty, chocolate, molasses.                               |
| 24h NC SMF SCF | 82.25 $\pm$ 0.23 | Caramelized, nutty, chocolate, citric acid.                            |
| 24h PC SSF SPF | 84.30 $\pm$ 1.20 | Caramelized, nutty, chocolate, citric acid.                            |
| 24h PC SSF SCF | 83.15 $\pm$ 0.42 | Caramelized, nutty, chocolate, citric acid.                            |
| 24h PC SMF SPF | 83.30 $\pm$ 0.79 | Caramelized, nutty, chocolate, berry, brown sugar, citric acid.        |
| 24h PC SMF SCF | 83.15 $\pm$ 0.68 | Caramelized, nutty, chocolate, molasses, sour.                         |
| 48h NC SSF SPF | 83.00 $\pm$ 0.62 | Caramelized, nutty, chocolate, brown sugar, citric acid.               |
| 48h NC SSF SCF | 82.70 $\pm$ 0.77 | Caramelized, nutty, chocolate, citrus fruit, citric acid.              |
| 48h NC SMF SPF | 82.95 $\pm$ 0.12 | Caramelized, nutty, citrus fruit, brown sugar.                         |
| 48h NC SMF SCF | 83.35 $\pm$ 0.31 | Caramelized, nutty, berry, citric acid.                                |
| 48h PC SSF SPF | 83.30 $\pm$ 0.54 | Caramelized, nutty, chocolate, citric acid.                            |
| 48h PC SSF SCF | 83.75 $\pm$ 1.23 | Caramelized, nutty, chocolate, berry.                                  |
| 48h PC SMF SPF | 83.15 $\pm$ 0.72 | Caramelized, nutty, chocolate, berry.                                  |
| 48h PC SMF SCF | 82.60 $\pm$ 0.83 | Caramelized, nutty, chocolate.                                         |
| 72h NC SSF SPF | 83.50 $\pm$ 0.54 | Caramelized, nutty, chocolate, citric acid.                            |
| 72h NC SSF SCF | 84.50 $\pm$ 0.92 | Caramelized, nutty, brown sugar.                                       |
| 72h NC SMF SPF | 82.60 $\pm$ 0.64 | Caramelized, nutty, citrus fruit.                                      |
| 72h NC SMF SCF | 83.35 $\pm$ 1.12 | Caramelized, nutty, brown sugar, citric acid.                          |
| 72h PC SSF SPF | 83.60 $\pm$ 0.35 | Caramelized, nutty, molasses, citrus fruit, citric acid.               |
| 72h PC SSF SCF | 84.25 $\pm$ 1.28 | Caramelized, nutty, brown sugar, citrus fruit, malic acid..            |
| 72h PC SMF SPF | 83.15 $\pm$ 1.25 | Caramelized, nutty, chocolate, berry, citric acid.                     |
| 72h PC SMF SCF | 83.00 $\pm$ 0.75 | Caramelized, nutty, chocolate, berry, citric acid.                     |

NC= Natural coffee; PC= Pulped coffee

SSF= Solid-state Fermentation; SMF = Submerged Fermentation

SPF = Spontaneous fermentation; SCF= Starter culture fermentation
