# Supplementary material for: Evaluation of Arabica Coffee Fermentation Using Machine Learning
Source: MDPI journal article supplement (doi:10.3390/foods13030454), 2024-02-01
Supplement: s1 [file s1]

### Supplementary Material

**Table S1.** Treatments conducted in the coffee fermentation process.

| Type of fruit <sup>1</sup> | Water adding <sup>2</sup> | Type of microbiota <sup>3</sup> | Fermentation<br>hours |
|----------------------------|---------------------------|---------------------------------|-----------------------|
| NC                         | Control                   | Control                         | 0                     |
| PC                         | Control                   | Control                         | 0                     |
| NC                         | SSF                       | SPF                             | 24                    |
|                            |                           |                                 | 48                    |
|                            |                           |                                 | 72                    |
| NC                         | SSF                       | SCF                             | 24                    |
|                            |                           |                                 | 48                    |
|                            |                           |                                 | 72                    |
| NC                         | SMF                       | SPF                             | 24                    |
|                            |                           |                                 | 48                    |
|                            |                           |                                 | 72                    |
| NC                         | SMF                       | SCF                             | 24                    |
|                            |                           |                                 | 48                    |
|                            |                           |                                 | 72                    |
| PC                         | SSF                       | SPF                             | 24                    |
|                            |                           |                                 | 48                    |
|                            |                           |                                 | 72                    |
| PC                         | SSF                       | SCF                             | 24                    |
|                            |                           |                                 | 48                    |
|                            |                           |                                 | 72                    |
| PC                         | SMF                       | SPF                             | 24                    |
|                            |                           |                                 | 48                    |
|                            |                           |                                 | 72                    |
| PC                         | SMF                       | SCF                             | 24                    |
|                            |                           |                                 | 48                    |
|                            |                           |                                 | 72                    |

<sup>1</sup>NC= Natural coffee; PC= Pulped coffee

<sup>2</sup>SSF= Solid-state Fermentation; SMF = Submerged Fermentation

<sup>3</sup>SPF = Spontaneous fermentation; SCF= Starter culture fermentation
